# Supplementary material for: The Anti-Cancer Drug Dabrafenib Is a Potent Activator of the Human Pregnane X Receptor
Source: PubMed Central journal article supplement (PMC7407672; doi:10.3390/cells9071641), 2020-07-08
Supplement: cells-09-01641-s001.pdf [file cells-09-01641-s001.pdf]

## SUPPLEMENTARY MATERIALS

**Supplementary Table S1. List of reporter cell lines used in the**

**study**

| Reporter cell line    | Nuclear receptor | Reporter gene                                   |
|-----------------------|------------------|-------------------------------------------------|
| HG5LN                 |                  | GAL4RE <sub>5</sub> - $\beta$ GLOBIN-Luciferase |
| HG5LN GAL4-hPXR       | GAL4-hPXR        | GAL4RE <sub>5</sub> - $\beta$ GLOBIN-Luciferase |
| HG5LN GAL4-mPXR       | GAL4-mPXR        | GAL4RE <sub>5</sub> - $\beta$ GLOBIN-Luciferase |
| HG5LN GAL4-zfPXR      | GAL4-zfPXR       | GAL4RE <sub>5</sub> - $\beta$ GLOBIN-Luciferase |
| HG5LN GAL4-hCAR       | GAL4-hCAR        | GAL4RE <sub>5</sub> - $\beta$ GLOBIN-Luciferase |
| HG5LN GAL4-hCAR APYLT | GAL4-hCAR APYLT  | GAL4RE <sub>5</sub> - $\beta$ GLOBIN-Luciferase |
| LS174T hPXR           | hPXR             | CYP3A4-Luciferase                               |
| HEPG2 hPXR            | hPXR             | CYP3A4-Luciferase                               |
| 22RV1 hPXR            | hPXR             | CYP3A4-Luciferase                               |

**Supplementary Table S2. List of livers**

| Liver | Sex    | Age | Pathology                           |
|-------|--------|-----|-------------------------------------|
| FT438 | Female | 70  | Cholangiocarcinoma                  |
| FT439 | Male   | 73  | Donor organ                         |
| FT440 | Male   | 76  | Metastasis of cholic adenocarcinoma |

**Supplementary Table S3. List of primers used in RT-PCR experiments**

| Gene    | Forward               | Reverse               |
|---------|-----------------------|-----------------------|
| CYP2B6  | CCTTTTGGGAAACCTTCTGC  | ACTCCACACAGCATGACCAC  |
| CYP3A4  | GCCTGGTGCTCCTCTATCTA  | GGCTGTTGACCATCATAAAAG |
| ABCG2   | CATGTACTGGCGAAGAATATT | CACGTGATTCTTCCACAAGCC |
| FGF-19  | AGATCAAGGCAGTCGCTCTG  | AAAGCACAGTCTTCCTCCGA  |
| hPXR    | GCAGGAGCAATTCGCCATT   | TCGGTGAGCATAGCCATGATC |
| GAPDH * | GAGTCAACGGATTTGGTCGT  | GACAAGCTTCCC GTTCTCAG |
| RLP0*   | TCGACAATGGCAGCATCTAC  | GCCTTGACCTTTTCAGCAAG  |

\* Housekeeping genes

**Supplementary Table S4.**

|                   | HG5LN GAL4-HPXR |                       | LS174T-PXR   |                          | HEPG2-PXR    |                          | 22RV1-PXR    |                          |
|-------------------|-----------------|-----------------------|--------------|--------------------------|--------------|--------------------------|--------------|--------------------------|
|                   | %<br>max act    | EC <sub>50</sub> (nM) | %<br>max act | EC <sub>50</sub><br>(nM) | %<br>max act | EC <sub>50</sub><br>(nM) | %<br>max act | EC <sub>50</sub><br>(nM) |
| <b>DMSO</b>       | 19.1            |                       | 7.2          |                          | 8.4          |                          | 26.8         |                          |
| <b>SR12813</b>    | 100             | 239 ± 109             | 100          | 434 ± 81                 | 100          | 184.7 ± 11.7             | 100          | 125 ± 34                 |
| <b>Dabrafenib</b> | 98.3            | 82 ± 13.9             | 96.6         | 110 ± 0.18               | 76.9         | 97.6 30.9                | 85.5         | 98.4 ± 42                |

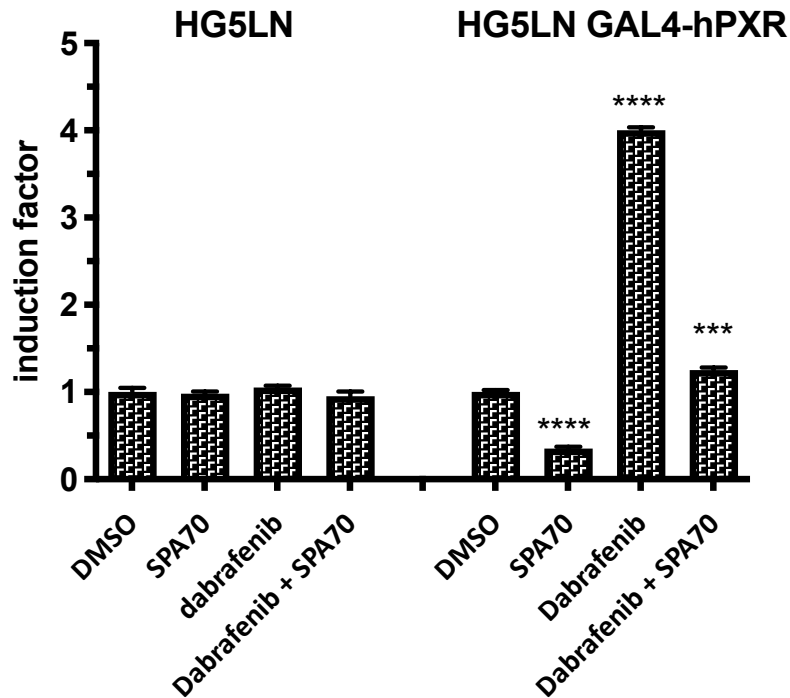

**Supplementary Figure S1:** Effects of dabrafenib on the activation of hPXR as measured by luciferase reporter assay. Activation has been measured in HG5LN control cells or HG5LN cells expressing human PXR (hPXR) treated by DMSO (0.1%), SPA70 3  $\mu$ M, dabrafenib 0.3  $\mu$ M and dabrafenib 0.3  $\mu$ M + SPA70 3  $\mu$ M for 24 hours. Results are expressed as fold induction as compared to control. Data are the mean  $\pm$  sd of three independent experiments. \*\*\*\* P < 0.0001, \*\*\* P < 0.001 (Student's t-test) compared to DMSO treated cells.

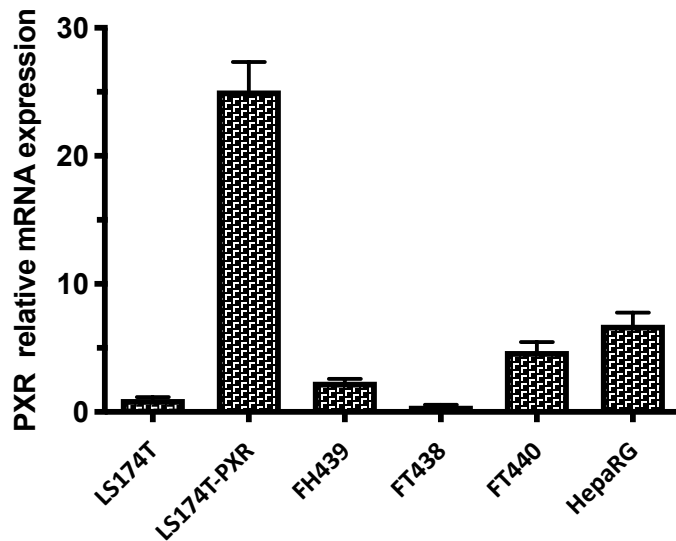

**Supplementary Figure S 2:** hPXR expression in LS174T, LS174T-PXR, differentiated HepaRG cells and fresh human hepatocytes. RT-qPCR of PXR mRNA expression were performed in LS174T, LS174T hPXR and differentiated HepaRG cells and human primary hepatocytes (three independent donors: FT438, FH439 and FH440). Results were obtained from three independent experiments performed in duplicate. The relative gene expression levels were normalized using GAPDH content.

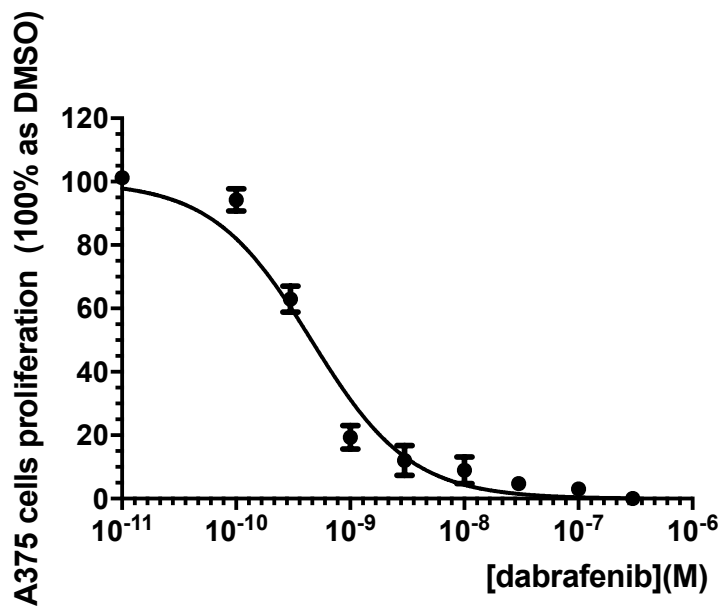

**Supplementary Figure S3:** Effects of dabrafenib on the inhibition of the proliferation of the BRAF<sup>v600</sup> mutated melanoma cell line A-375. A375 cells were treated with DMSO (0,1%) or increasing concentrations of dabrafenib for 4 days and cell growth was measured using MTT assay. Results are expressed as percentage of proliferation as compared to DMSO treated cells. Data are the mean  $\pm$  sd of three independent experiments.
